# Supplementary material
Source: Springer Nature journal article supplement (https://www.springermedizin.de/resource/supplementary/13256_2014_2961_MOESM1_ESM.pdf/9650938)
Supplement: MOESM1 [file 9650938]

Nasal cannula (No. 2)

The image shows a medical workstation with a nasal cannula (No. 2) connected to a blue corrugated tube. This tube is connected to a ViVO 30 ventilator, which is mounted on a stand. The ventilator is connected to a PMH200 humidifier, which is also on a stand. A clear plastic reservoir is attached to the top of the humidifier. A clear plastic bag is hanging from the top of the stand. A clear plastic bag is also hanging from the top of the stand. A clear plastic bag is also hanging from the top of the stand.

ViVO 30

PMH200
